# Supplementary material
Source: PubMed Central journal article supplement (PMC8049594)
Supplement: mmc1.pdf [file mmc1.pdf]

# THE LANCET

## Microbe

### Supplementary appendix

This appendix formed part of the original submission. We post it as supplied by the authors.

This online publication has been corrected. The corrected version first appeared at [thelancet.com](https://www.thelancet.com) on April 27, 2021.

Supplement to: Bermejo-Martin JF, Almansa R, Tedim AP, et al. Mounting evidence of impaired viral control in severe COVID-19. *Lancet Microbe* 2021; published online April 15. [https://doi.org/10.1016/S2666-5247\(21\)00084-7](https://doi.org/10.1016/S2666-5247(21)00084-7).

## Evidences of uncontrolled viral replication in severe COVID-19

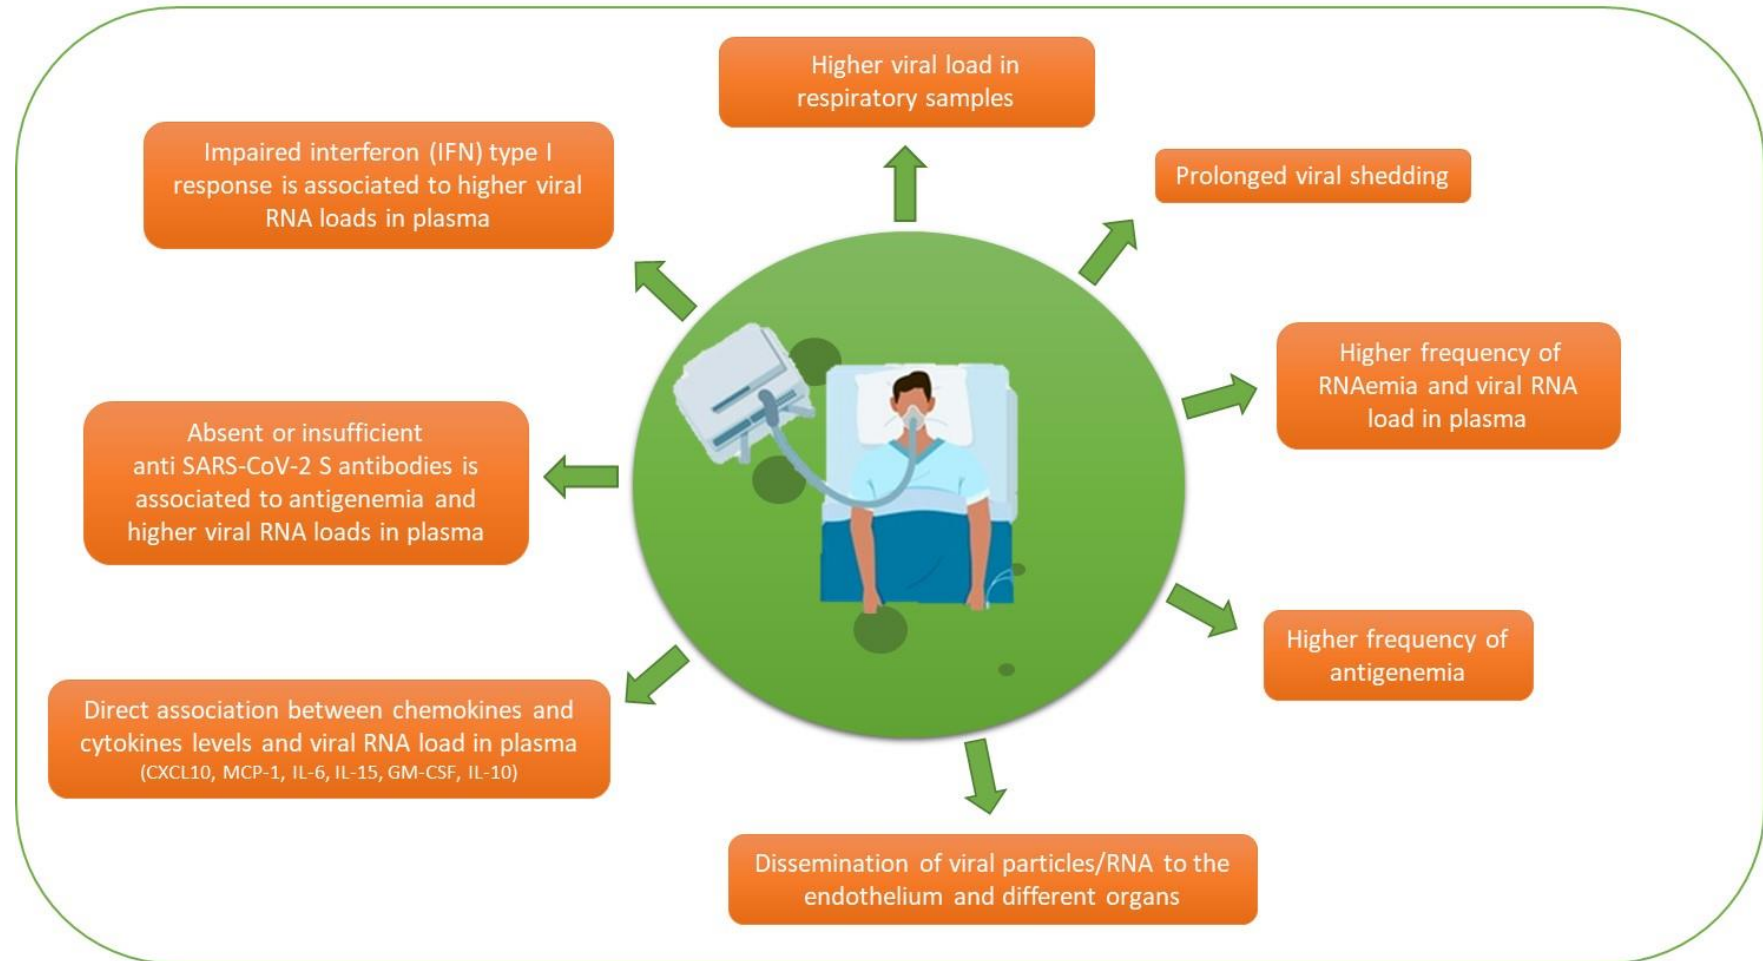

**Figure 1: Overview of the published evidence supporting that patients with severe COVID-19 are not able to control viral replication, translating into increased viral burden and dissemination.** Image of the patient on ventilator was taken from <https://www.freepikcompany.com/es/terminos-y-condiciones#nav-freepik>
